# Supplementary material for: The Effect of Sleep Quality on Coronary Lesion Severity and Prognosis in the Young Acute Coronary Syndrome Population
Source: MDPI journal article supplement (doi:10.3390/jcdd11020068), 2024-02-19
Supplement: s1 [file s1]

Supplementary Table S1. Univariate Logistic regression analysis between covariates and SYNTAX group.

|                                      | OR (95%CI)         | <i>P</i> value |
|--------------------------------------|--------------------|----------------|
| Age                                  | 0.995(0.94,1.053)  | 0.860          |
| Men                                  | 1.227(0.517,2.916) | 0.643          |
| Body mass index                      | 1.047(0.983,1.116) | 0.156          |
| Hypertension                         | 0.773(0.509,1.176) | 0.230          |
| Diabetes mellitus                    | 1.726(1.113,2.678) | 0.015          |
| Hyperlipidemia                       | 2.042(0.933,4.468) | 0.074          |
| Smoker                               | 0.727(0.475,1.113) | 0.142          |
| Systolic blood pressure              | 1.003(0.990,1.016) | 0.635          |
| Diastolic blood pressure             | 0.993(0.977,1.010) | 0.416          |
| Fasting blood glucose                | 1.067(1.004,1.135) | 0.038          |
| HbA1c (%)                            | 1.151(0.988,1.342) | 0.071          |
| Triglyceride                         | 1.064(0.921,1.229) | 0.400          |
| Total cholesterol                    | 1.019(0.847,1.225) | 0.843          |
| High density lipoprotein cholesterol | 0.241(0.077,0.755) | 0.015          |
| Low density lipoprotein cholesterol  | 1.052(0.849,1.302) | 0.645          |
| Alanine transaminase                 | 0.996(0.989,1.004) | 0.345          |
| Aspartate transaminase               | 0.998(0.993,1.003) | 0.440          |
| Hcy (umol/L)                         | 1.017(0.997,1.037) | 0.101          |
| Creatinine (umol/L)                  | 1.007(0.993,1.021) | 0.337          |
| eGFR (mL/min)                        | 0.992(0.975,1.009) | 0.337          |
| Uric acid (umol/L)                   | 1.002(1.000,1.005) | 0.053          |
| Hyper-sensitive C-reactive protein   | 1.022(0.982,1.063) | 0.293          |
| Troponin I                           | 0.986(0.955,1.017) | 0.366          |
| Time for bed                         | 1.413(1.136,1.758) | 0.002          |
| Sleep duration                       | 0.764(0.630,0.927) | 0.006          |
| PSQI score                           | 1.265(1.171,1.368) | <0.001         |

|            |                    |        |
|------------|--------------------|--------|
| PSQI grade | 3.851(2.361,6.279) | <0.001 |
|------------|--------------------|--------|

---

HbA1C=glycosylated hemoglobin A1C; PSQI=Pittsburgh Sleep Quality Index; PSQI score: a continuous variable; PSQI grade: a dichotomous variable; OR, odds ratio; CI, confidence interval.

Supplementary Table S2. The collinearity check between covariates in model 3 of logistic regression analysis.

| Model             | Unstandardized |            | Standardized |        | Sig.  | Collinearity Statistics |       |
|-------------------|----------------|------------|--------------|--------|-------|-------------------------|-------|
|                   | Coefficients   |            | Coefficients | t      |       | Tolerance               | VIF   |
|                   | B              | Std. Error | Beta         |        |       |                         |       |
| (Constant)        | -0.511         | 0.3        |              | -1.703 | 0.089 |                         |       |
| Age               | -0.049         | 0.076      | -0.033       | -0.652 | 0.515 | 0.784                   | 1.276 |
| Men               | 0.003          | 0.005      | 0.025        | 0.557  | 0.578 | 0.958                   | 1.044 |
| BMI               | 0.004          | 0.006      | 0.037        | 0.769  | 0.442 | 0.841                   | 1.19  |
| Hypertension      | 0.002          | 0.035      | 0.002        | 0.054  | 0.957 | 0.943                   | 1.061 |
| Diabetes mellitus | -0.076         | 0.052      | -0.091       | -1.465 | 0.144 | 0.512                   | 1.953 |
| Hyperlipidemia    | 0.093          | 0.054      | 0.077        | 1.717  | 0.087 | 0.968                   | 1.033 |
| Smoker            | -0.056         | 0.037      | -0.071       | -1.492 | 0.136 | 0.88                    | 1.136 |
| FBG               | 0.007          | 0.006      | 0.056        | 1.182  | 0.238 | 0.891                   | 1.122 |
| HbA1c             | 0.035          | 0.018      | 0.116        | 1.962  | 0.05  | 0.564                   | 1.773 |
| HDL-C             | 0.008          | 0.094      | 0.004        | 0.083  | 0.934 | 0.873                   | 1.145 |
| Uric acid         | 0              | 0          | 0.047        | 0.978  | 0.328 | 0.853                   | 1.172 |
| Hcy               | 0.001          | 0.002      | 0.017        | 0.365  | 0.715 | 0.937                   | 1.067 |
| PSQI grade        | 0.215          | 0.035      | 0.278        | 6.183  | 0     | 0.974                   | 1.027 |

Dependent Variable: SYNTAX score

BMI=body mass index; FBG=fasting blood glucose; HbA1C=glycosylated hemoglobin A1C; HDL-C=high density lipoprotein cholesterol; PSQI=Pittsburgh Sleep Quality Index; PSQI grade: a dichotomous variable.

Supplementary Table S3. Univariate Cox proportional hazards regression analysis of covariates and Clinical outcomes

|                                      | HR (95%CI)          | <i>P</i> value |
|--------------------------------------|---------------------|----------------|
| Age                                  | 1.011(0.953,1.072)  | 0.721          |
| Men                                  | 0.748(0.345,1.622)  | 0.462          |
| Body mass index                      | 1.038(0.976,1.105)  | 0.236          |
| Hypertension                         | 0.945(0.613,1.456)  | 0.796          |
| Diabetes mellitus                    | 1.060(0.667,1.686)  | 0.804          |
| Hyperlipidemia                       | 2.687(0.984,7.337)  | 0.054          |
| Smoker                               | 0.692(0.449,1.066)  | 0.095          |
| Systolic blood pressure              | 1.006(0.992,1.019)  | 0.405          |
| Diastolic blood pressure             | 1.002(0.985,1.02)   | 0.785          |
| Fasting blood glucose                | 1.024(0.97,1.081)   | 0.391          |
| HbA1c (%)                            | 1.114(0.963,1.289)  | 0.145          |
| Triglyceride                         | 1.084(0.952,1.234)  | 0.223          |
| Total cholesterol                    | 0.864(0.703,1.062)  | 0.165          |
| High density lipoprotein cholesterol | 1.057(0.353,3.159)  | 0.921          |
| Low density lipoprotein cholesterol  | 0.789(0.614,1.015)  | 0.066          |
| Alanine transaminase                 | 0.989(0.978,1)      | 0.245          |
| Aspartate transaminase               | 0.998(0.992,1.004)  | 0.466          |
| Hcy (umol/L)                         | 1.003(0.983,1.024)  | 0.755          |
| Creatinine (umol/L)                  | 1.005(0.99,1.02)    | 0.487          |
| eGFR (mL/min)                        | 0.99(0.973,1.007)   | 0.229          |
| Uric acid (umol/L)                   | 1.002(0.999,1.004)  | 0.183          |
| Hyper-sensitive C-reactive protein   | 1.04(1.005,1.077)   | 0.027          |
| Troponin I                           | 1(0.978,1.023)      | 0.99           |
| Complete revascularization           | 0.648(0.412,1.020)  | 0.061          |
| SYNTAX score                         | 1.048(1.027,1.068)  | <0.001         |
| PSQI grade                           | 5.468(2.897,10.319) | <0.001         |

HbA1C=glycosylated hemoglobin A1C; PSQI=Pittsburgh Sleep Quality Index; PSQI grade: a dichotomous variable;

HR, hazard ratio; CI, confidence interval.

Supplementary Table S4. The collinearity check between covariates in adjusted model of Cox proportional hazards regression analysis

| Model                      | Unstandardized Coefficients |            | Standardized Coefficients |        | Collinearity Statistics |           |       |
|----------------------------|-----------------------------|------------|---------------------------|--------|-------------------------|-----------|-------|
|                            | B                           | Std. Error | Beta                      | t      | Sig.                    | Tolerance | VIF   |
| (Constant)                 | -0.14                       | 0.227      |                           | -0.616 | 0.538                   |           |       |
| Age                        | -0.042                      | 0.07       | -0.028                    | -0.595 | 0.552                   | 0.886     | 1.129 |
| Men                        | 0.001                       | 0.005      | 0.007                     | 0.154  | 0.878                   | 0.985     | 1.015 |
| Hypertension               | 0.007                       | 0.034      | 0.009                     | 0.199  | 0.842                   | 0.982     | 1.018 |
| Diabetes mellitus          | -0.078                      | 0.048      | -0.094                    | -1.627 | 0.104                   | 0.571     | 1.751 |
| Hyperlipidemia             | 0.098                       | 0.053      | 0.081                     | 1.851  | 0.065                   | 0.977     | 1.024 |
| Smoker                     | -0.058                      | 0.037      | -0.074                    | -1.597 | 0.111                   | 0.885     | 1.131 |
| HbA1c                      | 0.029                       | 0.017      | 0.096                     | 1.669  | 0.096                   | 0.568     | 1.759 |
| LDL-C                      | -0.043                      | 0.018      | -0.107                    | -2.392 | 0.017                   | 0.939     | 1.065 |
| Hs-CRP                     | 0.008                       | 0.003      | 0.107                     | 2.36   | 0.019                   | 0.924     | 1.082 |
| Complete revascularization | -0.076                      | 0.034      | -0.098                    | 2.238  | 0.026                   | 0.982     | 1.019 |
| SYNTAX Score               | 0.006                       | 0.002      | 0.16                      | 3.486  | 0.001                   | 0.902     | 1.109 |
| PSQI grade                 | 0.179                       | 0.035      | 0.232                     | 5.106  | 0                       | 0.914     | 1.094 |

Dependent Variable: MACEs

HbA1C=glycosylated hemoglobin A1C; LDL-C=low density lipoprotein cholesterol; Hs-CRP=hyper-sensitive C-reactive protein; PSQI=Pittsburgh Sleep Quality Index; PSQI grade: a dichotomous variable.
